# Supplementary material
Source: MDPI journal article supplement (https://www.mdpi.com/2673-8937/4/1/5)
Supplement: s1 [file s1]

Archive with 1 entries (1 files):
- ijtm-2619168-supplementary.zip.pdf
